# Supplementary material for: Comparison of the characteristics of long-term users of electronic cigarettes versus nicotine replacement therapy: A cross-sectional survey of English ex-smokers and current smokers
Source: PubMed Central journal article supplement (PMC4528068; doi:10.1016/j.drugalcdep.2015.05.005), 2015-08-01
Supplement: mmc1.pdf [file mmc1.pdf]

| Background information                                                                                                      |                                                                                                                                                                                                                                                                                                                                                                                                                                                                               |                                            |             |                 |               |
|-----------------------------------------------------------------------------------------------------------------------------|-------------------------------------------------------------------------------------------------------------------------------------------------------------------------------------------------------------------------------------------------------------------------------------------------------------------------------------------------------------------------------------------------------------------------------------------------------------------------------|--------------------------------------------|-------------|-----------------|---------------|
| 1. Age                                                                                                                      | _____ years                                                                                                                                                                                                                                                                                                                                                                                                                                                                   |                                            |             |                 |               |
| 2. Sex                                                                                                                      | Male                                                                                                                                                                                                                                                                                                                                                                                                                                                                          | 1                                          |             |                 |               |
|                                                                                                                             | Female                                                                                                                                                                                                                                                                                                                                                                                                                                                                        | 2                                          |             |                 |               |
| 3. Ethnic group                                                                                                             | <b>White</b><br>British <sup>1</sup> Irish <sup>2</sup> Other White <sup>3</sup><br><b>Black</b><br>African <sup>4</sup> Caribbean <sup>5</sup> Other Black <sup>6</sup><br><b>Asian</b><br>Indian <sup>7</sup> Pakistani <sup>8</sup> Bangladeshi <sup>9</sup> Chinese <sup>10</sup><br>Other Asian <sup>11</sup><br><b>Mixed</b><br>White/Black <sup>12</sup> White/Asian <sup>13</sup> Other Mixed <sup>14</sup><br><b>Other</b> <sup>15</sup><br>(Please specify) : _____ |                                            |             |                 |               |
| 4. What is your highest qualification?                                                                                      | None                                                                                                                                                                                                                                                                                                                                                                                                                                                                          | 1                                          |             |                 |               |
|                                                                                                                             | GCSE or equivalent                                                                                                                                                                                                                                                                                                                                                                                                                                                            | 2                                          |             |                 |               |
|                                                                                                                             | A level or equivalent                                                                                                                                                                                                                                                                                                                                                                                                                                                         | 3                                          |             |                 |               |
|                                                                                                                             | Degree or equivalent                                                                                                                                                                                                                                                                                                                                                                                                                                                          | 4                                          |             |                 |               |
|                                                                                                                             | Other                                                                                                                                                                                                                                                                                                                                                                                                                                                                         | 5                                          |             |                 |               |
| 5. Marital Status                                                                                                           | Single                                                                                                                                                                                                                                                                                                                                                                                                                                                                        | 1                                          |             |                 |               |
|                                                                                                                             | Separated/divorced                                                                                                                                                                                                                                                                                                                                                                                                                                                            | 2                                          |             |                 |               |
|                                                                                                                             | Married/living with partner                                                                                                                                                                                                                                                                                                                                                                                                                                                   | 3                                          |             |                 |               |
|                                                                                                                             | Other                                                                                                                                                                                                                                                                                                                                                                                                                                                                         | 4                                          |             |                 |               |
| 6. What percentage of your friends and family smoke?                                                                        | _____ (enter number)                                                                                                                                                                                                                                                                                                                                                                                                                                                          |                                            |             |                 |               |
| 7. In the last 3 weeks have you had signs of any of the following ( <i>Circle as many as apply</i> )                        | Chest infection                                                                                                                                                                                                                                                                                                                                                                                                                                                               | 1                                          |             |                 |               |
|                                                                                                                             | Cold/Flu                                                                                                                                                                                                                                                                                                                                                                                                                                                                      | 2                                          |             |                 |               |
|                                                                                                                             | Sore Throat                                                                                                                                                                                                                                                                                                                                                                                                                                                                   | 3                                          |             |                 |               |
|                                                                                                                             | Fever                                                                                                                                                                                                                                                                                                                                                                                                                                                                         | 4                                          |             |                 |               |
|                                                                                                                             | Nothing wrong                                                                                                                                                                                                                                                                                                                                                                                                                                                                 | 0                                          |             |                 |               |
| 8. Have you experienced any of the following during the last 30 days and if so, please indicate how strong this effect was. |                                                                                                                                                                                                                                                                                                                                                                                                                                                                               |                                            |             |                 |               |
|                                                                                                                             | <b>Unpleasant effect</b>                                                                                                                                                                                                                                                                                                                                                                                                                                                      | <b>Strength (<i>circle one number</i>)</b> |             |                 |               |
|                                                                                                                             |                                                                                                                                                                                                                                                                                                                                                                                                                                                                               | <i>Nothing at all</i>                      | <i>Weak</i> | <i>Moderate</i> | <i>Strong</i> |
|                                                                                                                             | Dizziness                                                                                                                                                                                                                                                                                                                                                                                                                                                                     | 1                                          | 2           | 3               | 4             |
|                                                                                                                             | Headache                                                                                                                                                                                                                                                                                                                                                                                                                                                                      | 1                                          | 2           | 3               | 4             |
|                                                                                                                             | Nausea                                                                                                                                                                                                                                                                                                                                                                                                                                                                        | 1                                          | 2           | 3               | 4             |
|                                                                                                                             | Sleep disturbances                                                                                                                                                                                                                                                                                                                                                                                                                                                            | 1                                          | 2           | 3               | 4             |
|                                                                                                                             | Concentration difficulties                                                                                                                                                                                                                                                                                                                                                                                                                                                    | 1                                          | 2           | 3               | 4             |
|                                                                                                                             | Seizures                                                                                                                                                                                                                                                                                                                                                                                                                                                                      | 1                                          | 2           | 3               | 4             |
|                                                                                                                             | Visual disturbances                                                                                                                                                                                                                                                                                                                                                                                                                                                           | 1                                          | 2           | 3               | 4             |
|                                                                                                                             | Trouble with breathing during the day                                                                                                                                                                                                                                                                                                                                                                                                                                         | 1                                          | 2           | 3               | 4             |
|                                                                                                                             | Trouble with breathing when sleeping                                                                                                                                                                                                                                                                                                                                                                                                                                          | 1                                          | 2           | 3               | 4             |
|                                                                                                                             | Wheezing                                                                                                                                                                                                                                                                                                                                                                                                                                                                      | 1                                          | 2           | 3               | 4             |
|                                                                                                                             | Chest pain                                                                                                                                                                                                                                                                                                                                                                                                                                                                    | 1                                          | 2           | 3               | 4             |
|                                                                                                                             | Chest tightness                                                                                                                                                                                                                                                                                                                                                                                                                                                               | 1                                          | 2           | 3               | 4             |
|                                                                                                                             | Cough during the day                                                                                                                                                                                                                                                                                                                                                                                                                                                          | 1                                          | 2           | 3               | 4             |
|                                                                                                                             | Cough during the night                                                                                                                                                                                                                                                                                                                                                                                                                                                        | 1                                          | 2           | 3               | 4             |
|                                                                                                                             | Dry mouth                                                                                                                                                                                                                                                                                                                                                                                                                                                                     | 1                                          | 2           | 3               | 4             |
|                                                                                                                             | Extensive saliva                                                                                                                                                                                                                                                                                                                                                                                                                                                              | 1                                          | 2           | 3               | 4             |
|                                                                                                                             | Other, please specify:<br>_____                                                                                                                                                                                                                                                                                                                                                                                                                                               | 1                                          | 2           | 3               | 4             |

|                                                                                                                                               |                                                                                                                                                                                                                                                                                                                                                                                                                                                                                                                                                                                                                                                                                                                                                                                                                                                                                                                                 |                   |    |            |   |                         |   |                         |   |            |   |         |    |         |   |         |    |         |   |             |    |           |   |      |    |             |   |  |  |
|-----------------------------------------------------------------------------------------------------------------------------------------------|---------------------------------------------------------------------------------------------------------------------------------------------------------------------------------------------------------------------------------------------------------------------------------------------------------------------------------------------------------------------------------------------------------------------------------------------------------------------------------------------------------------------------------------------------------------------------------------------------------------------------------------------------------------------------------------------------------------------------------------------------------------------------------------------------------------------------------------------------------------------------------------------------------------------------------|-------------------|----|------------|---|-------------------------|---|-------------------------|---|------------|---|---------|----|---------|---|---------|----|---------|---|-------------|----|-----------|---|------|----|-------------|---|--|--|
| 9. Over the last 24h have you taken any of these medications ( <i>Circle as many as apply</i> )                                               | Aspirin 1<br>Paracetamol 2<br>Ibuprofen 3<br>Flu vaccine 4<br>Nothing 0<br>Other, please specify:<br>_____                                                                                                                                                                                                                                                                                                                                                                                                                                                                                                                                                                                                                                                                                                                                                                                                                      |                   |    |            |   |                         |   |                         |   |            |   |         |    |         |   |         |    |         |   |             |    |           |   |      |    |             |   |  |  |
| <b>Smoking</b>                                                                                                                                |                                                                                                                                                                                                                                                                                                                                                                                                                                                                                                                                                                                                                                                                                                                                                                                                                                                                                                                                 |                   |    |            |   |                         |   |                         |   |            |   |         |    |         |   |         |    |         |   |             |    |           |   |      |    |             |   |  |  |
| 10. "Smoking is part of me"<br>( <i>please circle number to indicate how much you agree with the statement</i> )                              | <table style="width: 100%; border: none;"> <tr> <td style="text-align: left;"><b>Not at all</b></td> <td style="text-align: center;">1</td> <td style="text-align: center;">2</td> <td style="text-align: center;">3</td> <td style="text-align: center;">4</td> <td style="text-align: center;">5</td> <td style="text-align: right;"><b>Completely agree</b></td> </tr> </table>                                                                                                                                                                                                                                                                                                                                                                                                                                                                                                                                              | <b>Not at all</b> | 1  | 2          | 3 | 4                       | 5 | <b>Completely agree</b> |   |            |   |         |    |         |   |         |    |         |   |             |    |           |   |      |    |             |   |  |  |
| <b>Not at all</b>                                                                                                                             | 1                                                                                                                                                                                                                                                                                                                                                                                                                                                                                                                                                                                                                                                                                                                                                                                                                                                                                                                               | 2                 | 3  | 4          | 5 | <b>Completely agree</b> |   |                         |   |            |   |         |    |         |   |         |    |         |   |             |    |           |   |      |    |             |   |  |  |
| 11. What brand of cigarettes do you usually smoke?                                                                                            |                                                                                                                                                                                                                                                                                                                                                                                                                                                                                                                                                                                                                                                                                                                                                                                                                                                                                                                                 |                   |    |            |   |                         |   |                         |   |            |   |         |    |         |   |         |    |         |   |             |    |           |   |      |    |             |   |  |  |
| 12. How many cigarettes per day do you usually smoke? ( <i>Please write exact number on the line and then circle the appropriate number</i> ) | Number of cigarettes/day: _____<br>10 or less 0<br>11 to 20 1<br>21 to 30 2<br>31 or more 3                                                                                                                                                                                                                                                                                                                                                                                                                                                                                                                                                                                                                                                                                                                                                                                                                                     |                   |    |            |   |                         |   |                         |   |            |   |         |    |         |   |         |    |         |   |             |    |           |   |      |    |             |   |  |  |
| 13. Do you smoke.... ?                                                                                                                        | Daily 1<br>Less than daily 2                                                                                                                                                                                                                                                                                                                                                                                                                                                                                                                                                                                                                                                                                                                                                                                                                                                                                                    |                   |    |            |   |                         |   |                         |   |            |   |         |    |         |   |         |    |         |   |             |    |           |   |      |    |             |   |  |  |
| 14. "I could be a non-smoker"<br>( <i>please circle number to indicate how much you agree with the statement</i> )                            | <table style="width: 100%; border: none;"> <tr> <td style="text-align: left;"><b>Not at all</b></td> <td style="text-align: center;">1</td> <td style="text-align: center;">2</td> <td style="text-align: center;">3</td> <td style="text-align: center;">4</td> <td style="text-align: center;">5</td> <td style="text-align: right;"><b>Completely agree</b></td> </tr> </table>                                                                                                                                                                                                                                                                                                                                                                                                                                                                                                                                              | <b>Not at all</b> | 1  | 2          | 3 | 4                       | 5 | <b>Completely agree</b> |   |            |   |         |    |         |   |         |    |         |   |             |    |           |   |      |    |             |   |  |  |
| <b>Not at all</b>                                                                                                                             | 1                                                                                                                                                                                                                                                                                                                                                                                                                                                                                                                                                                                                                                                                                                                                                                                                                                                                                                                               | 2                 | 3  | 4          | 5 | <b>Completely agree</b> |   |                         |   |            |   |         |    |         |   |         |    |         |   |             |    |           |   |      |    |             |   |  |  |
| 15. How long ago did you smoke your most recent cigarette?                                                                                    | Date:<br>Time:                                                                                                                                                                                                                                                                                                                                                                                                                                                                                                                                                                                                                                                                                                                                                                                                                                                                                                                  |                   |    |            |   |                         |   |                         |   |            |   |         |    |         |   |         |    |         |   |             |    |           |   |      |    |             |   |  |  |
| 16. Do you smoke hand-rolled cigarettes?                                                                                                      | Never 0<br>Sometimes 1<br>Exclusively 2                                                                                                                                                                                                                                                                                                                                                                                                                                                                                                                                                                                                                                                                                                                                                                                                                                                                                         |                   |    |            |   |                         |   |                         |   |            |   |         |    |         |   |         |    |         |   |             |    |           |   |      |    |             |   |  |  |
| 17. How many do you usually smoke per day?                                                                                                    |                                                                                                                                                                                                                                                                                                                                                                                                                                                                                                                                                                                                                                                                                                                                                                                                                                                                                                                                 |                   |    |            |   |                         |   |                         |   |            |   |         |    |         |   |         |    |         |   |             |    |           |   |      |    |             |   |  |  |
| 18. How much tobacco do you usually use per week?                                                                                             | _____ g or _____ ounces                                                                                                                                                                                                                                                                                                                                                                                                                                                                                                                                                                                                                                                                                                                                                                                                                                                                                                         |                   |    |            |   |                         |   |                         |   |            |   |         |    |         |   |         |    |         |   |             |    |           |   |      |    |             |   |  |  |
| 19. At what age did you start smoking on a daily basis?                                                                                       | _____ years                                                                                                                                                                                                                                                                                                                                                                                                                                                                                                                                                                                                                                                                                                                                                                                                                                                                                                                     |                   |    |            |   |                         |   |                         |   |            |   |         |    |         |   |         |    |         |   |             |    |           |   |      |    |             |   |  |  |
| 20. Are you currently trying to cut down on how much you smoke but not currently trying to stop?                                              | Yes 1<br>No 2                                                                                                                                                                                                                                                                                                                                                                                                                                                                                                                                                                                                                                                                                                                                                                                                                                                                                                                   |                   |    |            |   |                         |   |                         |   |            |   |         |    |         |   |         |    |         |   |             |    |           |   |      |    |             |   |  |  |
| 21. Which of these products, if any, have you used in to help you cut-down?                                                                   | <table style="width: 100%; border: none;"> <tr> <td>Zyban</td> <td style="text-align: center;">1</td> <td>Oral spray</td> <td style="text-align: center;">8</td> </tr> <tr> <td>24 h patch</td> <td style="text-align: center;">2</td> <td>Microtab</td> <td style="text-align: center;">9</td> </tr> <tr> <td>16 h patch</td> <td style="text-align: center;">3</td> <td>Lozenge</td> <td style="text-align: center;">10</td> </tr> <tr> <td>4mg gum</td> <td style="text-align: center;">4</td> <td>Champix</td> <td style="text-align: center;">11</td> </tr> <tr> <td>2mg gum</td> <td style="text-align: center;">5</td> <td>E-cigarette</td> <td style="text-align: center;">12</td> </tr> <tr> <td>Inhalator</td> <td style="text-align: center;">6</td> <td>None</td> <td style="text-align: center;">13</td> </tr> <tr> <td>Nasal spray</td> <td style="text-align: center;">7</td> <td></td> <td></td> </tr> </table> | Zyban             | 1  | Oral spray | 8 | 24 h patch              | 2 | Microtab                | 9 | 16 h patch | 3 | Lozenge | 10 | 4mg gum | 4 | Champix | 11 | 2mg gum | 5 | E-cigarette | 12 | Inhalator | 6 | None | 13 | Nasal spray | 7 |  |  |
| Zyban                                                                                                                                         | 1                                                                                                                                                                                                                                                                                                                                                                                                                                                                                                                                                                                                                                                                                                                                                                                                                                                                                                                               | Oral spray        | 8  |            |   |                         |   |                         |   |            |   |         |    |         |   |         |    |         |   |             |    |           |   |      |    |             |   |  |  |
| 24 h patch                                                                                                                                    | 2                                                                                                                                                                                                                                                                                                                                                                                                                                                                                                                                                                                                                                                                                                                                                                                                                                                                                                                               | Microtab          | 9  |            |   |                         |   |                         |   |            |   |         |    |         |   |         |    |         |   |             |    |           |   |      |    |             |   |  |  |
| 16 h patch                                                                                                                                    | 3                                                                                                                                                                                                                                                                                                                                                                                                                                                                                                                                                                                                                                                                                                                                                                                                                                                                                                                               | Lozenge           | 10 |            |   |                         |   |                         |   |            |   |         |    |         |   |         |    |         |   |             |    |           |   |      |    |             |   |  |  |
| 4mg gum                                                                                                                                       | 4                                                                                                                                                                                                                                                                                                                                                                                                                                                                                                                                                                                                                                                                                                                                                                                                                                                                                                                               | Champix           | 11 |            |   |                         |   |                         |   |            |   |         |    |         |   |         |    |         |   |             |    |           |   |      |    |             |   |  |  |
| 2mg gum                                                                                                                                       | 5                                                                                                                                                                                                                                                                                                                                                                                                                                                                                                                                                                                                                                                                                                                                                                                                                                                                                                                               | E-cigarette       | 12 |            |   |                         |   |                         |   |            |   |         |    |         |   |         |    |         |   |             |    |           |   |      |    |             |   |  |  |
| Inhalator                                                                                                                                     | 6                                                                                                                                                                                                                                                                                                                                                                                                                                                                                                                                                                                                                                                                                                                                                                                                                                                                                                                               | None              | 13 |            |   |                         |   |                         |   |            |   |         |    |         |   |         |    |         |   |             |    |           |   |      |    |             |   |  |  |
| Nasal spray                                                                                                                                   | 7                                                                                                                                                                                                                                                                                                                                                                                                                                                                                                                                                                                                                                                                                                                                                                                                                                                                                                                               |                   |    |            |   |                         |   |                         |   |            |   |         |    |         |   |         |    |         |   |             |    |           |   |      |    |             |   |  |  |
| 22. Do you regularly use any of the following in situations when you are not allowed to smoke?                                                | <table style="width: 100%; border: none;"> <tr> <td>Zyban</td> <td style="text-align: center;">1</td> <td>Oral spray</td> <td style="text-align: center;">8</td> </tr> <tr> <td>24 h patch</td> <td style="text-align: center;">2</td> <td>Microtab</td> <td style="text-align: center;">9</td> </tr> <tr> <td>16 h patch</td> <td style="text-align: center;">3</td> <td>Lozenge</td> <td style="text-align: center;">10</td> </tr> <tr> <td>4mg gum</td> <td style="text-align: center;">4</td> <td>Champix</td> <td style="text-align: center;">11</td> </tr> <tr> <td>2mg gum</td> <td style="text-align: center;">5</td> <td>E-cigarette</td> <td style="text-align: center;">12</td> </tr> <tr> <td>Inhalator</td> <td style="text-align: center;">6</td> <td>None</td> <td style="text-align: center;">13</td> </tr> <tr> <td>Nasal spray</td> <td style="text-align: center;">7</td> <td></td> <td></td> </tr> </table> | Zyban             | 1  | Oral spray | 8 | 24 h patch              | 2 | Microtab                | 9 | 16 h patch | 3 | Lozenge | 10 | 4mg gum | 4 | Champix | 11 | 2mg gum | 5 | E-cigarette | 12 | Inhalator | 6 | None | 13 | Nasal spray | 7 |  |  |
| Zyban                                                                                                                                         | 1                                                                                                                                                                                                                                                                                                                                                                                                                                                                                                                                                                                                                                                                                                                                                                                                                                                                                                                               | Oral spray        | 8  |            |   |                         |   |                         |   |            |   |         |    |         |   |         |    |         |   |             |    |           |   |      |    |             |   |  |  |
| 24 h patch                                                                                                                                    | 2                                                                                                                                                                                                                                                                                                                                                                                                                                                                                                                                                                                                                                                                                                                                                                                                                                                                                                                               | Microtab          | 9  |            |   |                         |   |                         |   |            |   |         |    |         |   |         |    |         |   |             |    |           |   |      |    |             |   |  |  |
| 16 h patch                                                                                                                                    | 3                                                                                                                                                                                                                                                                                                                                                                                                                                                                                                                                                                                                                                                                                                                                                                                                                                                                                                                               | Lozenge           | 10 |            |   |                         |   |                         |   |            |   |         |    |         |   |         |    |         |   |             |    |           |   |      |    |             |   |  |  |
| 4mg gum                                                                                                                                       | 4                                                                                                                                                                                                                                                                                                                                                                                                                                                                                                                                                                                                                                                                                                                                                                                                                                                                                                                               | Champix           | 11 |            |   |                         |   |                         |   |            |   |         |    |         |   |         |    |         |   |             |    |           |   |      |    |             |   |  |  |
| 2mg gum                                                                                                                                       | 5                                                                                                                                                                                                                                                                                                                                                                                                                                                                                                                                                                                                                                                                                                                                                                                                                                                                                                                               | E-cigarette       | 12 |            |   |                         |   |                         |   |            |   |         |    |         |   |         |    |         |   |             |    |           |   |      |    |             |   |  |  |
| Inhalator                                                                                                                                     | 6                                                                                                                                                                                                                                                                                                                                                                                                                                                                                                                                                                                                                                                                                                                                                                                                                                                                                                                               | None              | 13 |            |   |                         |   |                         |   |            |   |         |    |         |   |         |    |         |   |             |    |           |   |      |    |             |   |  |  |
| Nasal spray                                                                                                                                   | 7                                                                                                                                                                                                                                                                                                                                                                                                                                                                                                                                                                                                                                                                                                                                                                                                                                                                                                                               |                   |    |            |   |                         |   |                         |   |            |   |         |    |         |   |         |    |         |   |             |    |           |   |      |    |             |   |  |  |

|                                                                                                                                                                                                                        |                                                                                                                                                                                                                                                                                                                                                                                                                                                                                                                                                                                                                                                                                                               |                                                                                                                                                                            |
|------------------------------------------------------------------------------------------------------------------------------------------------------------------------------------------------------------------------|---------------------------------------------------------------------------------------------------------------------------------------------------------------------------------------------------------------------------------------------------------------------------------------------------------------------------------------------------------------------------------------------------------------------------------------------------------------------------------------------------------------------------------------------------------------------------------------------------------------------------------------------------------------------------------------------------------------|----------------------------------------------------------------------------------------------------------------------------------------------------------------------------|
| 23. How many serious attempts to stop smoking have you made in the last 12 months? By serious attempt I mean you decided that you would try to make sure you never smoked again<br><i>(Please write number in box)</i> |                                                                                                                                                                                                                                                                                                                                                                                                                                                                                                                                                                                                                                                                                                               |                                                                                                                                                                            |
| 24. Which, if any, of the following contributed to you making your most recent quit attempt <i>(tick all that apply)</i> ?                                                                                             | Advice from a GP\health professional 1<br>TV advert for a nicotine replacement product 2<br>TV advert for an electronic cigarette 3<br>Government TV\radio\press advert 4<br>Hearing about a new stop smoking treatment 5<br>A decision that smoking was too expensive 6<br>Being faced with smoking restrictions 7<br>I knew someone else who was stopping 8<br>Seeing a health warning on a cigarette packet 9<br>Being contacted by my local NHS SSS 10<br>Health problems I had at the time 11<br>A concern about future health problems 12<br>Attending a local stop smoking activity or event 13<br>Something said by family\friends\children 14<br>A significant birthday 15<br>Other, please specify: |                                                                                                                                                                            |
| 25. During your most recent serious quit attempt which (if any) did you try to help you stop smoking <i>(tick all that apply)</i> ?                                                                                    | Zyban 1<br>24 h patch 2<br>16 h patch 3<br>4mg gum 4<br>2mg gum 5<br>Inhalator 6<br>Nasal spray 7<br>Oral spray 8<br>Microtab 9<br>Lozenge 10<br>Champix 11<br>E-cigarette 12                                                                                                                                                                                                                                                                                                                                                                                                                                                                                                                                 | NHS SSS 13<br>Helpline 14<br>Book/Booklet 15<br>Website 16<br>App on handheld device 17<br>Hypnotherapy 18<br>Acupuncture 19<br>None 20<br>Other, please specify:<br>_____ |
| 26. If applicable, how long ago was the last time you used products to help you stop smoking? <i>(Please write number in box and indicate years, months, weeks or days)</i>                                            |                                                                                                                                                                                                                                                                                                                                                                                                                                                                                                                                                                                                                                                                                                               |                                                                                                                                                                            |
| 27. How long have you been smoking for? <i>(in years)</i>                                                                                                                                                              |                                                                                                                                                                                                                                                                                                                                                                                                                                                                                                                                                                                                                                                                                                               |                                                                                                                                                                            |
| 28. In the past year, what is the longest you have gone without a cigarette? <i>(Please write number in box and indicate years, months, weeks or days)</i>                                                             |                                                                                                                                                                                                                                                                                                                                                                                                                                                                                                                                                                                                                                                                                                               |                                                                                                                                                                            |
| 29. How soon after you wake up do you smoke your first cigarette?                                                                                                                                                      | Within 5 minutes 3<br>6-30 minutes 2<br>31-60 minutes 1<br>More than 60 minutes 0                                                                                                                                                                                                                                                                                                                                                                                                                                                                                                                                                                                                                             |                                                                                                                                                                            |
| 30. Do you find it difficult to stop smoking in no-smoking areas?                                                                                                                                                      | No 0<br>Yes 1                                                                                                                                                                                                                                                                                                                                                                                                                                                                                                                                                                                                                                                                                                 |                                                                                                                                                                            |
| 31. Which cigarette would you hate most to give up?                                                                                                                                                                    | The first of the morning 1<br>Other 0                                                                                                                                                                                                                                                                                                                                                                                                                                                                                                                                                                                                                                                                         |                                                                                                                                                                            |

|                                                                                                      |                                                                                                                                                                                                                                                                                                                                                                                               |                                 |
|------------------------------------------------------------------------------------------------------|-----------------------------------------------------------------------------------------------------------------------------------------------------------------------------------------------------------------------------------------------------------------------------------------------------------------------------------------------------------------------------------------------|---------------------------------|
| 32. Do you smoke more frequently in the first hours after waking than during the rest of the day?    | No<br>Yes                                                                                                                                                                                                                                                                                                                                                                                     | 0<br>1                          |
| 33. Do you smoke if you are so ill that you are in bed most of the day?                              | No<br>Yes                                                                                                                                                                                                                                                                                                                                                                                     | 0<br>1                          |
| 34. Which of the following best describes you?                                                       | I REALLY want to stop smoking and intend to in the next month<br>I REALLY want to stop smoking and intend to in the next 3 months<br>I want to stop smoking and hope to soon<br>I REALLY want to stop smoking but I don't know when I will<br>I want to stop smoking but haven't thought about when<br>I think I should stop smoking but don't really want to<br>I don't want to stop smoking | 1<br>2<br>3<br>4<br>5<br>6<br>7 |
| 35. Compared with e-cigarettes, do you think that cigarettes are...?                                 | Completely safe<br>Less dangerous than e-cigarettes<br>As dangerous as e-cigarettes<br>More dangerous than e-cigarettes<br>Don't know                                                                                                                                                                                                                                                         | 1<br>2<br>3<br>4<br>0           |
| 36. Compared with NRT, do you think that cigarettes are...?                                          | Completely safe<br>Less dangerous than NRT<br>As dangerous as NRT<br>More dangerous than NRT<br>Don't know                                                                                                                                                                                                                                                                                    | 1<br>2<br>3<br>4<br>0           |
| 37. Compared with e-cigarettes, do you think that cigarettes are...?                                 | Not at all addictive<br>Less addictive than e-cigarettes<br>As addictive as e-cigarettes<br>More addictive than e-cigarettes<br>Don't know                                                                                                                                                                                                                                                    | 1<br>2<br>3<br>4<br>0           |
| 38. Compared with NRT, do you think that cigarettes are...?                                          | Not at all addictive<br>Less addictive than NRT<br>As addictive as NRT<br>More addictive than NRT<br>Don't know                                                                                                                                                                                                                                                                               | 1<br>2<br>3<br>4<br>0           |
| 39. Do you think you are addicted to cigarettes?                                                     | Yes<br>No                                                                                                                                                                                                                                                                                                                                                                                     | 1<br>0                          |
| <b>E-cigarettes (if applicable)</b>                                                                  |                                                                                                                                                                                                                                                                                                                                                                                               |                                 |
| 40. What is the brand name and model of e-cigarette you are currently using?                         | _____                                                                                                                                                                                                                                                                                                                                                                                         |                                 |
| 41. What is the solvent (base) of the nicotine solution (e-liquid) in the cigarette you usually use? | Only propylene glycol (PG)<br>Only glycerine (e.g. VG)<br>Mixture of glycerine and propylene glycol (VG/PG)<br>I don't know                                                                                                                                                                                                                                                                   | 1<br>2<br>3<br>4                |
| 42. What kind of e-cigarette do you currently use most often?                                        | Disposable model<br>With replaceable cartridge<br>Tank system – refill with nicotine solution<br>Other (Please describe _____)                                                                                                                                                                                                                                                                | 1<br>2<br>3<br>4                |
| 43. What is the nicotine concentration in the liquid or cartridges you use?                          | _____ mg/ml                                                                                                                                                                                                                                                                                                                                                                                   |                                 |

|                                                                                                                                                  |                                                                       |   |
|--------------------------------------------------------------------------------------------------------------------------------------------------|-----------------------------------------------------------------------|---|
| 44. What size are the cartridges you use?                                                                                                        | _____ ml                                                              |   |
| 45. How many cartridges do you usually use?                                                                                                      | _____ per day or _____ per week                                       |   |
| 46. How long ago did you last use an e-cigarette?                                                                                                | Date:<br>Time:                                                        |   |
| 47. In the past year, what is the longest you have gone without using an e-cigarette? (Please write number)                                      | _____ days/weeks/months (delete as appropriate)                       |   |
| 48. How long have you been using e-cigarettes? (in months)                                                                                       |                                                                       |   |
| 49. Where did you buy your first e-cigarette?                                                                                                    | Online                                                                | 1 |
|                                                                                                                                                  | Kiosk in a shopping mall                                              | 2 |
|                                                                                                                                                  | Special shop (vapour lounge)                                          | 3 |
|                                                                                                                                                  | Other                                                                 | 4 |
| 50. What was the brand and model of e-cigarette you used first time?                                                                             | _____                                                                 |   |
| 51. What kind of e-cigarette did you use first time?                                                                                             | Disposable model                                                      | 1 |
|                                                                                                                                                  | With replaceable cartridge                                            | 2 |
|                                                                                                                                                  | Tank system – refill with nicotine solution                           | 3 |
|                                                                                                                                                  | Other (Please describe _____)                                         | 4 |
| 52. Where did you buy the e-cigarette you are currently using?                                                                                   | Online                                                                | 1 |
|                                                                                                                                                  | Kiosk in a shopping mall                                              | 2 |
|                                                                                                                                                  | Special shop (vapour lounge)                                          | 3 |
|                                                                                                                                                  | Other                                                                 | 4 |
| 53. Where do you currently buy cartridges for e-cigarette or e-liquid?                                                                           | Online                                                                | 1 |
|                                                                                                                                                  | Kiosk in a shopping mall                                              | 2 |
|                                                                                                                                                  | Special shop (vapour lounge)                                          | 3 |
|                                                                                                                                                  | Other                                                                 | 4 |
| 54. Was the last e-cigarette you tried or used flavoured to taste like menthol, mint or any other flavour such as spice, candy fruit or alcohol? | Yes                                                                   | 1 |
|                                                                                                                                                  | No                                                                    | 0 |
| 55. What is the flavour of e-cigarette you usually use?                                                                                          | _____                                                                 |   |
| 56. Usually, how soon after waking up do you draw your first puff on your e-cigarette?                                                           | 0 to 5 minutes                                                        | 1 |
|                                                                                                                                                  | 6 to 15 minutes                                                       | 2 |
|                                                                                                                                                  | 16 to 30 minutes                                                      | 3 |
|                                                                                                                                                  | 31 to 60 minutes                                                      | 4 |
|                                                                                                                                                  | 61+ minutes                                                           | 5 |
| 57. For you, stopping your use of the e-cigarette for good would be...                                                                           | Impossible                                                            | 1 |
|                                                                                                                                                  | Very difficult                                                        | 2 |
|                                                                                                                                                  | Fairly difficult                                                      | 3 |
|                                                                                                                                                  | Fairly easy                                                           | 4 |
|                                                                                                                                                  | Very easy                                                             | 5 |
| 58. Which of the following best describes you?                                                                                                   | I REALLY want to stop using e-cigs and intend to in the next month    | 1 |
|                                                                                                                                                  | I REALLY want to stop using e-cigs and intend to in the next 3 months | 2 |
|                                                                                                                                                  | I want to stop using e-cigs and hope to soon                          | 3 |
|                                                                                                                                                  | I REALLY want to stop using e-cigs but I don't know when I will       | 4 |
|                                                                                                                                                  | I want to stop using e-cigs but haven't thought about when            | 5 |
|                                                                                                                                                  | I think I should stop using e-cigs but don't really want to           | 6 |
|                                                                                                                                                  | I don't want to stop using e-cigs                                     | 7 |

|                                                                                      |                                                                                                                                                                                            |                            |
|--------------------------------------------------------------------------------------|--------------------------------------------------------------------------------------------------------------------------------------------------------------------------------------------|----------------------------|
| 59. Compared to tobacco cigarettes how satisfying is the e-cigarette?                | Much less than usual<br>A little less than usual<br>The same as usual<br>A little more than usual<br>Much more than usual                                                                  | 1<br>2<br>3<br>4<br>5      |
| 60. How helpful do you find e-cigarettes in enabling you to keep from smoking?       | Not at all helpful<br>Slightly helpful<br>Somewhat helpful<br>Very helpful<br>Extremely helpful                                                                                            | 1<br>2<br>3<br>4<br>5      |
| 61. How pleasant is the e-cigarette to use?                                          | Not at all pleasant<br>Slightly pleasant<br>Somewhat pleasant<br>Very pleasant<br>Extremely pleasant                                                                                       | 1<br>2<br>3<br>4<br>5      |
| 62. Do you enjoy the sensation in your throat and chest after using the e-cigarette? | Not at all<br>Slightly<br>Somewhat<br>Very<br>Extremely                                                                                                                                    | 1<br>2<br>3<br>4<br>5      |
| 63. How embarrassing are e-cigarettes to use in the company of others?               | Not at all embarrassing<br>Slightly embarrassing<br>Somewhat embarrassing<br>Very embarrassing<br>Extremely embarrassing                                                                   | 1<br>2<br>3<br>4<br>5      |
| 64. Would you use e-cigarettes to help you to stop smoking?                          | Not a smoker<br>Definitely not<br>Probably not<br>Maybe<br>Probably<br>Definitely                                                                                                          | 0<br>1<br>2<br>3<br>4<br>5 |
| 65. Would you recommend e-cigarettes to a friend who wanted to stop smoking?         | Definitely not<br>Probably not<br>Maybe<br>Probably<br>Definitely                                                                                                                          | 1<br>2<br>3<br>4<br>5      |
| 66. Do you think e-cigarettes are safe for your health?                              | Yes, absolutely safe<br>No, but they are safer than tobacco cigarettes<br>No, they are as dangerous as tobacco cigarettes<br>No, they are more dangerous than tobacco cigarettes           | 1<br>2<br>3<br>4           |
| 67. Do you think e-cigarettes are addictive?                                         | No, absolutely not<br>Yes, but they are less addictive than tobacco cigarettes<br>Yes, they are as addictive as tobacco cigarettes<br>Yes, they are more addictive than tobacco cigarettes | 1<br>2<br>3<br>4           |
| 68. Do you think you are addicted to e-cigarettes?                                   | Yes<br>No                                                                                                                                                                                  | 1<br>0                     |
| 69. Which product do you like the most?                                              | E-cigarette<br>Tobacco cigarette                                                                                                                                                           | 1<br>2                     |

|                                                                                                                                                                                                              |                                                                    |             |                   |  |
|--------------------------------------------------------------------------------------------------------------------------------------------------------------------------------------------------------------|--------------------------------------------------------------------|-------------|-------------------|--|
| 70. Which product is easier to use?                                                                                                                                                                          | E-cigarette                                                        | 1           |                   |  |
|                                                                                                                                                                                                              | Tobacco cigarette                                                  | 2           |                   |  |
| 71. Which product is more embarrassing to use?                                                                                                                                                               | E-cigarette                                                        | 1           |                   |  |
|                                                                                                                                                                                                              | Tobacco cigarette                                                  | 2           |                   |  |
| <b>Nicotine Replacement Therapy (if applicable)</b>                                                                                                                                                          |                                                                    |             |                   |  |
| 72. What kind of NRT did you first start using?                                                                                                                                                              | Patches                                                            | 1           |                   |  |
|                                                                                                                                                                                                              | Gum                                                                | 2           |                   |  |
|                                                                                                                                                                                                              | Inhalator                                                          | 3           |                   |  |
|                                                                                                                                                                                                              | Nasal spray                                                        | 4           |                   |  |
|                                                                                                                                                                                                              | Mouth spray                                                        | 5           |                   |  |
|                                                                                                                                                                                                              | Microtab                                                           | 6           |                   |  |
|                                                                                                                                                                                                              | Lozenge/tablet                                                     | 7           |                   |  |
| 73. What type of NRT are you currently using?                                                                                                                                                                |                                                                    |             |                   |  |
| 74. How much of this NRT do you usually use? ( <i>State the amount of nicotine in one 'item' of the relevant NRT and the frequency of usage in days, weeks or months; <u>check material brought in</u></i> ) |                                                                    | Mg per item | No per day/wk/mth |  |
|                                                                                                                                                                                                              | Patches                                                            |             |                   |  |
|                                                                                                                                                                                                              | Gum                                                                |             |                   |  |
|                                                                                                                                                                                                              | Inhalator                                                          |             |                   |  |
|                                                                                                                                                                                                              | Nasal spray                                                        |             |                   |  |
|                                                                                                                                                                                                              | Mouth spray                                                        |             |                   |  |
|                                                                                                                                                                                                              | Microtab                                                           |             |                   |  |
|                                                                                                                                                                                                              | Lozenge/tablet                                                     |             |                   |  |
| 75. How long ago did you last use NRT?                                                                                                                                                                       |                                                                    | Date:       |                   |  |
|                                                                                                                                                                                                              |                                                                    | Time:       |                   |  |
| 76. In the past year, what is the longest you have gone without using NRT? ( <i>Please write number in box and indicate years, months, weeks or days</i> )                                                   |                                                                    |             |                   |  |
| 77. How long have you been using NRT? ( <i>in months</i> )                                                                                                                                                   |                                                                    |             |                   |  |
| 78. Usually, how soon after waking up do you first use NRT?                                                                                                                                                  | 0 to 5 minutes                                                     | 1           |                   |  |
|                                                                                                                                                                                                              | 6 to 15 minutes                                                    | 2           |                   |  |
|                                                                                                                                                                                                              | 16 to 30 minutes                                                   | 3           |                   |  |
|                                                                                                                                                                                                              | 31 to 60 minutes                                                   | 4           |                   |  |
|                                                                                                                                                                                                              | 61+ minutes                                                        | 5           |                   |  |
| 79. For you, stopping your use of NRT for good would be...                                                                                                                                                   | Impossible                                                         | 1           |                   |  |
|                                                                                                                                                                                                              | Very difficult                                                     | 2           |                   |  |
|                                                                                                                                                                                                              | Fairly difficult                                                   | 3           |                   |  |
|                                                                                                                                                                                                              | Fairly easy                                                        | 4           |                   |  |
|                                                                                                                                                                                                              | Very easy                                                          | 5           |                   |  |
| 80. Which of the following best describes you?                                                                                                                                                               | I REALLY want to stop using NRT and intend to in the next month    | 1           |                   |  |
|                                                                                                                                                                                                              | I REALLY want to stop using NRT and intend to in the next 3 months | 2           |                   |  |
|                                                                                                                                                                                                              | I want to stop using NRT and hope to soon                          | 3           |                   |  |
|                                                                                                                                                                                                              | I REALLY want to stop using NRT but I don't know when I will       | 4           |                   |  |
|                                                                                                                                                                                                              | I want to stop using NRT but haven't thought about when            | 5           |                   |  |
|                                                                                                                                                                                                              | I think I should stop using NRT but don't really want to           | 6           |                   |  |
|                                                                                                                                                                                                              | I don't want to stop using NRT                                     | 7           |                   |  |

|                                                                          |                                                                                                                                                                                   |                            |
|--------------------------------------------------------------------------|-----------------------------------------------------------------------------------------------------------------------------------------------------------------------------------|----------------------------|
| 81. Compared to tobacco cigarettes how satisfying is NRT?                | Much less than usual<br>A little less than usual<br>The same as usual<br>A little more than usual<br>Much more than usual                                                         | 1<br>2<br>3<br>4<br>5      |
| 82. How helpful do you find NRT in enabling you to keep from smoking?    | Not at all helpful<br>Slightly helpful<br>Somewhat helpful<br>Very helpful<br>Extremely helpful                                                                                   | 1<br>2<br>3<br>4<br>5      |
| 83. How pleasant is NRT to use?                                          | Not at all pleasant<br>Slightly pleasant<br>Somewhat pleasant<br>Very pleasant<br>Extremely pleasant                                                                              | 1<br>2<br>3<br>4<br>5      |
| 84. Do you enjoy the sensation in your throat and chest after using NRT? | Not at all<br>Slightly<br>Somewhat<br>Very<br>Extremely                                                                                                                           | 1<br>2<br>3<br>4<br>5      |
| 85. How embarrassing is NRT to use in the company of others?             | Not at all embarrassing<br>Slightly embarrassing<br>Somewhat embarrassing<br>Very embarrassing<br>Extremely embarrassing                                                          | 1<br>2<br>3<br>4<br>5      |
| 86. Would you use NRT to help you to stop smoking?                       | Not a smoker<br>Definitely not<br>Probably not<br>Maybe<br>Probably<br>Definitely                                                                                                 | 0<br>1<br>2<br>3<br>4<br>5 |
| 87. Would you recommend NRT to a friend who wanted to stop smoking?      | Definitely not<br>Probably not<br>Maybe<br>Probably<br>Definitely                                                                                                                 | 1<br>2<br>3<br>4<br>5      |
| 88. Do you think NRT is safe for your health?                            | Yes, absolutely safe<br>No, but it is safer than tobacco cigarettes<br>No, it is as dangerous as tobacco cigarettes<br>No, it is more dangerous than tobacco cigarettes           | 1<br>2<br>3<br>4           |
| 89. Do you think NRT is addictive?                                       | No, absolutely not<br>Yes, but it is less addictive than tobacco cigarettes<br>Yes, it is as addictive as tobacco cigarettes<br>Yes, it is more addictive than tobacco cigarettes | 1<br>2<br>3<br>4           |
| 90. Do you think you are addicted to NRT?                                | Yes<br>No                                                                                                                                                                         | 1<br>0                     |



### Life Satisfaction

*These questions ask about your overall happiness and satisfaction with life. Please indicate how much you agree with the following questions/statements by circling the number that corresponds most to how you feel.*

91. All things considered, how satisfied are you with your life as a whole? *(Circle one number)*

|                          |                                |                               |                             |                       |
|--------------------------|--------------------------------|-------------------------------|-----------------------------|-----------------------|
| <b>Very dissatisfied</b> | <b>Moderately dissatisfied</b> | <b>No feelings either way</b> | <b>Moderately satisfied</b> | <b>Very satisfied</b> |
| 1                        | 2                              | 3                             | 4                           | 5                     |

92. Some people are generally very happy. They enjoy life regardless of what is going on, getting the most out of everything. To what extent does this characterisation describe you? *(Circle one number)*

|                   |   |   |   |   |   |   |   |                     |
|-------------------|---|---|---|---|---|---|---|---------------------|
| <b>Not at all</b> | 1 | 2 | 3 | 4 | 5 | 6 | 7 | <b>A great deal</b> |
|-------------------|---|---|---|---|---|---|---|---------------------|

### Mood and Physical Symptoms

*These questions ask you to describe how you have been feeling over the past 24 hours and about any urges to use particular products you might have had. Please indicate how much you agree with the following questions/statements by circling the number that corresponds most to how you feel.*

93. Please show for each of the items below how you have been feeling over the past 24 hours. *(Circle one number for each item).*

|                        | <b>Not at all</b> | <b>Slightly</b> | <b>Somewhat</b> | <b>Very</b> | <b>Extremely</b> |
|------------------------|-------------------|-----------------|-----------------|-------------|------------------|
| 1. Depressed           | 1                 | 2               | 3               | 4           | 5                |
| 2. Anxious             | 1                 | 2               | 3               | 4           | 5                |
| 3. Irritable           | 1                 | 2               | 3               | 4           | 5                |
| 4. Restless            | 1                 | 2               | 3               | 4           | 5                |
| 5. Hungry              | 1                 | 2               | 3               | 4           | 5                |
| 6. Poor concentration  | 1                 | 2               | 3               | 4           | 5                |
| 7. Poor sleep at night | 1                 | 2               | 3               | 4           | 5                |

94. How much of the time have you felt the urge to smoke a **cigarette** in the past 24 hours? *(Circle one number)*

|                   |                             |                         |                          |                            |                     |
|-------------------|-----------------------------|-------------------------|--------------------------|----------------------------|---------------------|
| <b>Not at all</b> | <b>A little of the time</b> | <b>Some of the time</b> | <b>A lot of the time</b> | <b>Almost all the time</b> | <b>All the time</b> |
| 0                 | 1                           | 2                       | 3                        | 4                          | 5                   |

95. How strong have the urges been? *(Circle one number)*

|                 |               |                 |               |                    |                         |
|-----------------|---------------|-----------------|---------------|--------------------|-------------------------|
| <b>No urges</b> | <b>Slight</b> | <b>Moderate</b> | <b>Strong</b> | <b>Very strong</b> | <b>Extremely strong</b> |
| 0               | 1             | 2               | 3             | 4                  | 5                       |

96. How much of the time have you felt the urge to use **nicotine replacement therapy/e-cigs** in the past 24 hours? *(Circle one number)*

|                   |                             |                         |                          |                            |                     |
|-------------------|-----------------------------|-------------------------|--------------------------|----------------------------|---------------------|
| <b>Not at all</b> | <b>A little of the time</b> | <b>Some of the time</b> | <b>A lot of the time</b> | <b>Almost all the time</b> | <b>All the time</b> |
| 0                 | 1                           | 2                       | 3                        | 4                          | 5                   |

97. How strong have the urges been? *(Circle one number)*

|                 |               |                 |               |                    |                         |
|-----------------|---------------|-----------------|---------------|--------------------|-------------------------|
| <b>No urges</b> | <b>Slight</b> | <b>Moderate</b> | <b>Strong</b> | <b>Very strong</b> | <b>Extremely strong</b> |
| 0               | 1             | 2               | 3             | 4                  | 5                       |
